# Supplementary material
Source: PubMed Central journal article supplement (PMC7994302)
Supplement: 41421_2021_250_MOESM1_ESM.pdf [file 41421_2021_250_MOESM1_ESM.pdf]

# Supplemental information

## Supplementary Figure S1

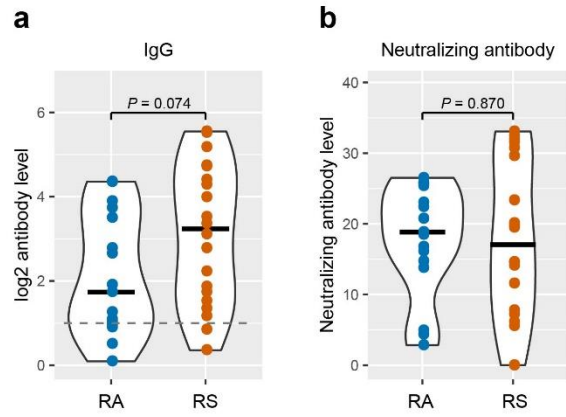

## Supplementary Figure S2

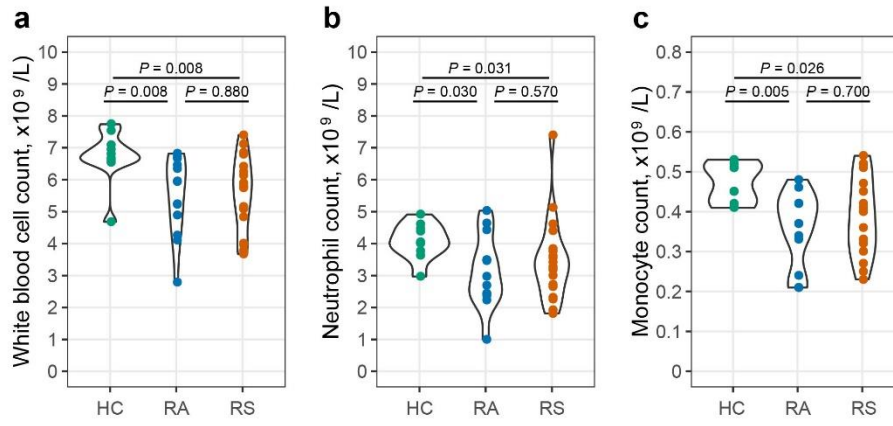

### Supplementary Figure S3

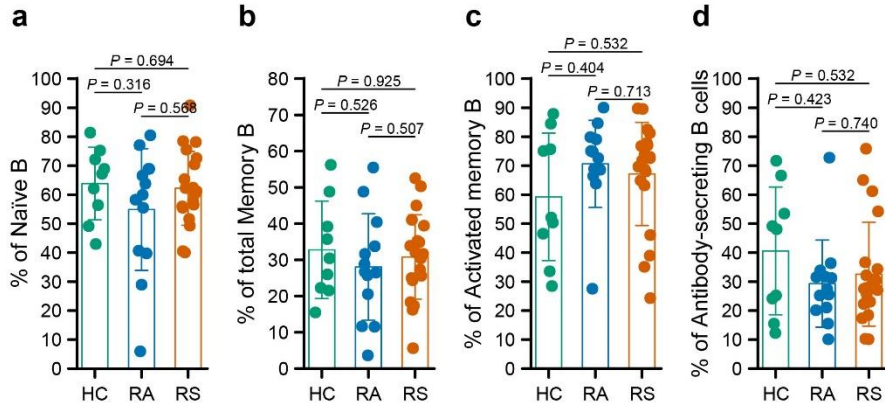

## Supplementary Figure S4

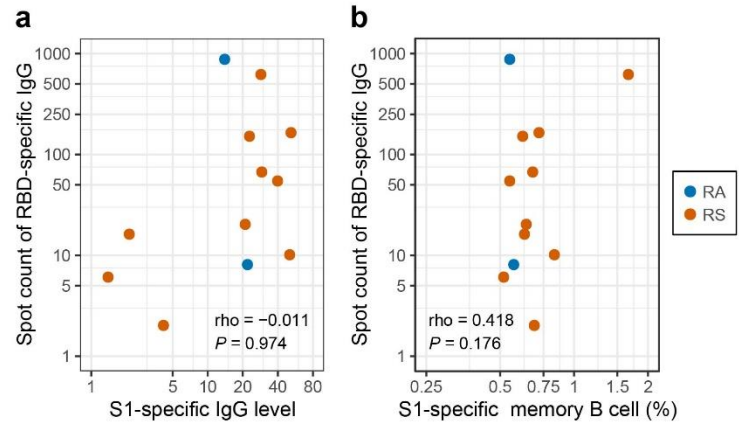

## Supplementary Figure S5

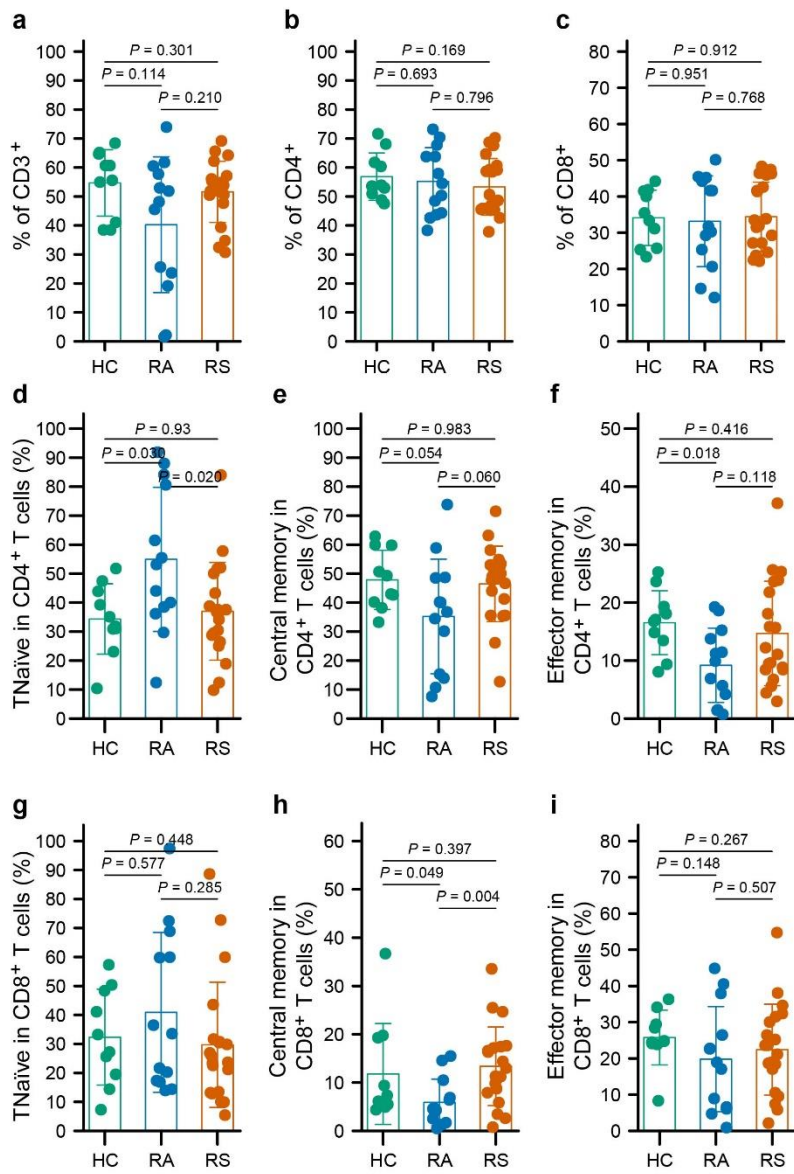

10

11

12

13 **Supplementary Figure legends**

14 **Supplementary Fig S1. SARS-CoV-2 IgG and neutralization antibody level in**  
15 **individuals recovered from COVID-19 with/without symptoms. a** Plasma SARS-  
16 CoV-2 specific IgG levels in individuals recovered from COVID-19. Data are shown as  
17  $\log_2 (S/CO+1)$ . **b** Plasma neutralization antibody level in individuals recovered from  
18 COVID-19. Data are shown as inhibition rate. Samples were from individuals  
19 recovered from symptomatic COVID-19 (RS,  $n = 20$ ), individuals recovered from  
20 asymptomatic COVID-19 (RA,  $n = 13$ ). Each symbol represents an individual  
21 throughout. Data were analyzed using unpaired, two-sided Mann-Whitney U test.

22

23 **Supplementary Fig S2. Blood Cell counts in healthy controls and individuals**  
24 **recovered from COVID-19. a** White blood cell count in different subjects. **b** Neutrophil  
25 count in different subjects. **c** Monocyte count in different subjects. Each symbol  
26 represents an individual throughout. Data was analyzed using unpaired, two-sided  
27 Mann-Whitney U test.

28

29 **Supplementary Fig S3. B cell subsets in subjects recovered from SARS-CoV-2.**  
30 **a** Percentage of naïve B cells within  $CD19^+$  B cell of PBMCs from different subjects. **b**  
31 Percentage of memory B cells ( $CD27^+$ ) within  $CD19^+$  B cell of PBMCs different subjects.  
32 **c, d** Percentage of activated memory B cell ( $CD21^+CD27^+CD38^{/low}$ ) (**c**) and (**d**)  
33 Percentage of antibody secreting B cell ( $CD21^+CD27^+CD38^{+/high}$ ) within  $CD19^+CD21^+$   
34  $CD27^+$  B cell of PBMCs different subjects. Each symbol represents an individual

35 throughout. Data was analyzed using unpaired, two-sided Mann-Whitney U test,  
36 presented as mean  $\pm$  SD.

37

38 **Supplementary Fig S4. The correlation analysis between RBD specific ELISpot**  
39 **dot number and virus specific IgG level/virus specific memory B cell number. a**

40 The correlation analysis between RBD specific ELISpot dot number and virus specific  
41 IgG level in individuals recovered from symptomatic. **b** The correlation analysis  
42 between RBD specific ELISPOT dot number and percentage of virus specific memory  
43 B cells in individuals recovered from symptomatic. The correlation was analyzed using  
44 Spearman's rank correlation test. Samples with countable ELISpot dot number were  
45 taken into this analysis (RA,  $n = 2$ , RS,  $n = 10$ ).

46

47 **Supplementary Fig S5. Peripheral T cell subsets in COVID-19 convalescent**

48 **individuals. a** The frequencies of CD3<sup>+</sup> T cells in PBMCs from different individuals.

49 **b, c** The frequencies of CD4<sup>+</sup> T cells (**b**) and CD8<sup>+</sup> T cells (**c**) within CD3<sup>+</sup> T cell pool  
50 in PBMCs from different individuals. **d-f** Proportions of naive T cell (CD45RA<sup>+</sup>CCR7<sup>+</sup>)

51 (**d**), central memory T cell (CD45RA<sup>-</sup>CCR7<sup>+</sup>) (**e**), and effector memory T cell

52 (CD45RA<sup>-</sup>CCR7<sup>-</sup>) subsets (**f**) in CD4<sup>+</sup> T cell populations from healthy controls and

53 recovered COVID-19. **g-i** Proportions of naive T cell (**g**), central memory T cell (**h**),

54 and effector memory T cell subsets (**i**) in CD8<sup>+</sup> T cell populations from healthy

55 controls and recovered COVID-19. Each symbol represents an individual throughout.

56 Data was analyzed using unpaired, two-sided Mann-Whitney U test.

**Supplemental Table S1. Clinical character statistics enrolled of this study.**

| <b>Characteristics</b>    | <b>RS (n = 20)</b> | <b>RA (n = 13)</b> | <b>HC (n = 10)</b> |
|---------------------------|--------------------|--------------------|--------------------|
| <b>Age (median, IQR)</b>  | 49.5 (44.8-55.8)   | 47.0 (27.0-55.0)   | 38.5 (27.0-52.8)   |
| <b>Sex (Male/Female)</b>  |                    |                    |                    |
| Male                      | 9 (45.0%)          | 4 (30.8%)          | 6 (60.0%)          |
| Female                    | 11 (55.0%)         | 9 (69.2%)          | 4 (40.0%)          |
| <b>Exposure</b>           |                    |                    |                    |
| From Wuhan                | 2 (10.0%)          | 1 (7.7%)           | -                  |
| Close contacts            | 18 (90.0%)         | 12 (92.3%)         | -                  |
| <b>Comorbidities</b>      |                    |                    |                    |
| Hypertension              | 4 (20.0%)          | 2 (15.4%)          | -                  |
| Cardiovascular disease    | 2 (10.0%)          | -                  | -                  |
| Diabetes                  | 3 (15.0%)          | 1 (7.7%)           | -                  |
| Chronic liver disease     | 2 (10.0%)          | 1 (7.7%)           | -                  |
| Any                       | 9 (45.0%)          | 3 (23.1%)          | -                  |
| <b>Signs and symptoms</b> |                    |                    |                    |
| Fever                     | 4 (20.0%)          | -                  | -                  |
| Fatigue                   | 1 (5.0%)           | -                  | -                  |
| Dry cough                 | 7 (35.0%)          | -                  | -                  |
| Inappetence               | 2 (10.0%)          | -                  | -                  |
| Dyspnea                   | 2 (10.0%)          | -                  | -                  |
| Expectoration             | 2 (10.0%)          | -                  | -                  |
| Pharyngalgia              | 2 (10.0%)          | -                  | -                  |
| Diarrhea                  | 1 (5.0%)           | -                  | -                  |
| Dizziness                 | 1 (5.0%)           | -                  | -                  |
| Vomiting                  | 1 (5.0%)           | -                  | -                  |
| Chills                    | 2 (10.0%)          | -                  | -                  |
| Rhinorrhea                | 2 (10.0%)          | -                  | -                  |
| Chest stuffiness          | 1 (5.0%)           | -                  | -                  |

RS: Recovered from symptomatic infection, RA: Recovered from asymptomatic infection, HC: Healthy

controls.



**Supplemental Table S2. Laboratory findings of individuals in this study.**

| <b>Variables</b>                             | <b>RS (n = 20)</b>     | <b>RA (n = 13)</b>     | <b>HC (n = 10)</b>     | <b>RS vs. HC</b> | <b>RA vs. HC</b> | <b>RS vs. RA</b> |
|----------------------------------------------|------------------------|------------------------|------------------------|------------------|------------------|------------------|
| <b>Blood routine examination</b>             |                        |                        |                        |                  |                  |                  |
| Red blood cell count, × 10 <sup>12</sup> /L  | 4.61 (4.15-5.01)       | 4.37 (4.27-4.79)       | 4.84 (4.57-4.93)       | 0.663            | 0.313            | 0.715            |
| White blood cell count, × 10 <sup>9</sup> /L | 5.75 (4.96-6.34)       | 5.94 (4.89-6.45)       | 6.73 (6.59-7.05)       | 0.008            | 0.008            | 0.880            |
| Neutrophils count, × 10 <sup>9</sup> /L      | 3.28 (2.67-3.80)       | 2.97 (2.42-3.49)       | 4.03 (3.83-4.45)       | 0.031            | 0.030            | 0.570            |
| Lymphocytes count, × 10 <sup>9</sup> /L      | 1.62 (1.44-1.94)       | 1.86 (1.38-2.47)       | 1.99 (1.74-2.33)       | 0.098            | 0.828            | 0.478            |
| Monocyte cell count, × 10 <sup>9</sup> /L    | 0.40 (0.32-0.46)       | 0.37 (0.33-0.42)       | 0.48 (0.43-0.51)       | 0.026            | 0.005            | 0.700            |
| Platelets count, × 10 <sup>9</sup> /L        | 162.00 (139.00-213.00) | 198.00 (157.00-213.00) | 229.00 (208.25-275.50) | 0.008            | 0.088            | 0.318            |
| Haemoglobin, g/L                             | 135.00 (121.50-146.00) | 129.00 (124.00-138.00) | 143.50 (135.50-147.50) | 0.550            | 0.402            | 1.000            |
| <b>Blood biochemistry</b>                    |                        |                        |                        |                  |                  |                  |
| Urea nitrogen, nmol/L                        | 5.60 (4.86-7.00)       | 4.83 (4.41-5.79)       | 5.51 (5.29-6.11)       | 0.965            | 0.284            | 0.217            |
| Creatinine, μmol/L                           | 72.20 (66.70-83.12)    | 64.10 (58.80-67.40)    | 68.55 (65.52-82.90)    | 0.775            | 0.186            | 0.068            |
| Glucose, mmol/L                              | 4.88 (3.83-7.22)       | 3.69 (3.06-5.17)       | 4.38 (4.13-6.30)       | 0.880            | 0.154            | 0.128            |
| Uric acid, μmol/L                            | 299.20 (250.02-331.05) | 276.70 (224.50-382.20) | 314.05 (296.73-376.22) | 0.328            | 0.232            | 0.730            |
| Total protein, g/L                           | 83.30 (81.35-86.15)    | 78.20 (77.50-80.40)    | 81.10 (77.45-85.90)    | 0.333            | 0.306            | 0.008            |
| Albumin, g/L                                 | 44.00 (42.40-45.23)    | 45.40 (42.10-45.80)    | 45.85 (45.17-47.08)    | 0.099            | 0.291            | 0.417            |
| Globulin, g/L                                | 39.90 (37.10-42.08)    | 33.00 (31.80-35.90)    | 35.05 (33.22-39.00)    | 0.118            | 0.402            | 0.002            |
| Alanine aminotransferase, U/L                | 23.50 (18.00-33.75)    | 15.00 (8.00-19.00)     | 19.50 (10.75-26.25)    | 0.271            | 0.264            | 0.010            |
| Aspartate aminotransferase, U/L              | 33.00 (26.75-41.50)    | 22.00 (20.00-31.00)    | 46.50 (35.00-49.75)    | 0.094            | 0.002            | 0.007            |
| γ-glutamyl transpeptidase, U/L               | 23.00 (11.75-41.00)    | 16.00 (14.00-17.00)    | 30.50 (22.25-36.75)    | 0.226            | 0.005            | 0.386            |

|                                                        |                        |                        |                        |       |       |       |
|--------------------------------------------------------|------------------------|------------------------|------------------------|-------|-------|-------|
| Total bilirubin, $\mu\text{mol/L}$                     | 7.95 (5.85-11.82)      | 7.20 (6.70-8.70)       | 7.95 (7.60-9.70)       | 0.843 | 0.402 | 0.407 |
| Direct bilirubin, $\mu\text{mol/L}$                    | 4.40 (3.27-5.48)       | 3.00 (2.20-3.60)       | 3.85 (3.37-4.27)       | 0.390 | 0.067 | 0.009 |
| Indirect bilirubin, $\mu\text{mol/L}$                  | 3.55 (2.65-6.80)       | 4.20 (3.70-5.50)       | 4.20 (3.23-5.58)       | 0.809 | 0.877 | 0.450 |
| Triglyceride, mmol/L                                   | 1.52 (1.01-2.17)       | 1.01 (0.86-2.12)       | 1.55 (1.03-2.19)       | 0.843 | 0.336 | 0.261 |
| Total cholesterol, mmol/L                              | 4.45 (3.96-5.09)       | 4.38 (4.03-4.56)       | 4.69 (4.06-5.34)       | 0.779 | 0.376 | 0.372 |
| High-density lipoprotein-cholesterol, mmol/L           | 1.16 (1.02-1.36)       | 0.94 (0.90-1.01)       | 1.17 (0.98-1.29)       | 0.758 | 0.038 | 0.001 |
| Low-density lipoprotein-cholesterol, mmol/L            | 2.17 (1.84-2.71)       | 2.75 (2.54-2.86)       | 2.77 (1.90-2.98)       | 0.322 | 0.877 | 0.043 |
| Lactate dehydrogenase, U/L                             | 194.50 (153.75-225.75) | 187.00 (169.00-204.00) | 169.50 (156.00-179.75) | 0.291 | 0.154 | 0.593 |
| Hypersensitive C-reactive protein, mg/L                | 1.18 (0.46-2.86)       | 0.65 (0.29-2.36)       | 0.92 (0.64-1.57)       | 0.779 | 0.577 | 0.347 |
| Modification of diet in renal disease equation, ml/min | -                      | 101.90 (93.90-109.80)  | 99.10 (96.80-109.00)   | -     | 0.849 | -     |

RS: Recovered from symptomatic infection, RA: Recovered from asymptomatic infection, HC: Healthy controls.

**Supplemental Table S3. Peptide constitution of peptide library used for T cell**

**ELISpot.**

| <b>Peptides library</b>              | <b>Sequence</b>                                                                                                                                                                                                                                                                                                                                                                                                                                                                                                                                                                                                                                                                                                                                                                                                                                                                           | <b>Number of peptides</b> |
|--------------------------------------|-------------------------------------------------------------------------------------------------------------------------------------------------------------------------------------------------------------------------------------------------------------------------------------------------------------------------------------------------------------------------------------------------------------------------------------------------------------------------------------------------------------------------------------------------------------------------------------------------------------------------------------------------------------------------------------------------------------------------------------------------------------------------------------------------------------------------------------------------------------------------------------------|---------------------------|
| SARS-CoV-2 S1 scanning pool          | (15mers with 11 aa overlap)                                                                                                                                                                                                                                                                                                                                                                                                                                                                                                                                                                                                                                                                                                                                                                                                                                                               | 166 peptides              |
| SARS-CoV-2 S2 N defined peptide pool | <ol style="list-style-type: none"> <li>1 LIDLQELGKY</li> <li>2 GTTLPKGIFY</li> <li>3 VTPSGTWLTY</li> <li>4 ILLNKHID</li> <li>5 GMSRIGMEV</li> <li>6 ALNTPKDHI</li> <li>7 LALLLLDRL</li> <li>8 LLLDRLNQL</li> <li>9 LQLPQGTTL</li> <li>10 ALNTLVKQL</li> <li>11 LITGRLQSL</li> <li>12 NLNESLIDL</li> <li>13 RLNEVAKNL</li> <li>14 VLNDILSRL</li> <li>15 VVFLHVTYV</li> <li>16 GSFCTQLNR</li> <li>17 GVFLHVITY</li> <li>18 AQALNTLVK</li> <li>19 ASANLAATK</li> <li>20 SLIDLQELGK</li> <li>21 SVLNDILSR</li> <li>22 VQIDRLITGR</li> <li>23 KTFPTEPKK</li> <li>24 SASAFFGMSR</li> <li>25 ATEGALNTPK</li> <li>26 LSPRWYFY</li> <li>27 APHGVVFLHV</li> <li>28 APSASAFFG</li> <li>29 LQIPFAMQM</li> <li>30 GRLQSLQTY</li> <li>31 MEVTPSGTWL</li> <li>32 MEVTPSGT</li> <li>33 AQFAPSASAFFGMSR</li> <li>34 YKTFPTEPKKDKKKK</li> <li>35 MAYRFNGIGVTQNVLY</li> <li>36 QLIRAAEIRASANLAATK</li> </ol> | 41 peptides               |

|                                               |                                                                                                                                                                                                                                                                                                                                                                                                                                                                                                                                                                                                                                                                                                                                                                                                                                                                                                                                |             |
|-----------------------------------------------|--------------------------------------------------------------------------------------------------------------------------------------------------------------------------------------------------------------------------------------------------------------------------------------------------------------------------------------------------------------------------------------------------------------------------------------------------------------------------------------------------------------------------------------------------------------------------------------------------------------------------------------------------------------------------------------------------------------------------------------------------------------------------------------------------------------------------------------------------------------------------------------------------------------------------------|-------------|
|                                               | 37 QALNTLVKQLSSNFGAI<br>38 IDRLITGRLQSLQTY<br>39 IDAYKTFPPTEPKKD<br>40 MSRIGMEVTPSGTWL<br>41 VLQLPQGTTLPKGFY                                                                                                                                                                                                                                                                                                                                                                                                                                                                                                                                                                                                                                                                                                                                                                                                                   |             |
| SARS-CoV-2 S N M<br>O defined peptide<br>pool | 1 CTFEYVSQPFLMDLE<br>2 EFVFKNIDGYFKIYS<br>3 KHTPINLVRDLPQGF<br>4 NLVRDLPQGFSALEP<br>5 YAWNRKRISNCVADY<br>6 GVSPTKLNDLCFTNV<br>7 GGNYNLYRLFRKSN<br>8 YLYRLFRKSNLKPFE<br>9 VVLSFELLHAPATVC<br>10 GPKKSTNLVKNKCVN<br>11 SVTTEILPVSMTKTS<br>12 STECSNLLLQYGSFC<br>13 NLLLQYGSFCTQLNR<br>14 NFSQILPDPSKPSKR<br>15 TDEMIAQYTSALLAG<br>16 GINASVVNIQKEIDR<br>17 LIDLQELGKYEQYI<br>18 YEQYIKWPWYIWLGF<br>19 MSDNGPQNQRNAPRITF<br>20 NQRNAPRITFGGPSDSTG<br>21 DQIGYYRRATRRIR<br>22 MKDLSRWYFYLL<br>23 LSPRWYFYLLGTGPEAGL<br>24 AFFGMSRIGMEVTPSGTW<br>25 GMEVTPSGTWLTYTGAIK<br>26 TWLTYTGAIKLDDKDPNF<br>27 PNFKDQVILLNKHIDAYK<br>28 LLNKHIDAYKTFPPTEPK<br>29 LLESELVIGAVILRGHLR<br>30 GAVILRGHLRIAGHHLGR<br>31 LRIAGHHLGRCDIKDLPK<br>32 PKEITVATSRTLSYYKL<br>33 TSRTLSYYKLGASQRVA<br>34 IGNYKLNTDHSSSSDNIA<br>35 YFLCWHTNCYDYCIPY<br>36 KDCVVLHSYFTSDYYQLY<br>37 YFTSDYYQLYSTQLSTDTGV<br>38 GVEHVTFEYFNKIVDEPEEH<br>39 LITLATCELYHYQECVR | 47 peptides |

|  |                       |  |
|--|-----------------------|--|
|  | 40 FHPLADNKFALTCFSTQF |  |
|  | 41 DGVKHVYQLRARSVSPKL |  |
|  | 42 ILLNKHID           |  |
|  | 43 MEVTPSGTWL         |  |
|  | 44 QLIRAAEIRASANLAATK |  |
|  | 45 SPRWYFYLL          |  |
|  | 46 YLGTGPEAGL         |  |
|  | 47 YLGTGPEA           |  |

**Supplemental Table S4. Key reagents.**

| <b>Reagent or resource</b>                                           | <b>Source</b>      | <b>Identifier</b> |
|----------------------------------------------------------------------|--------------------|-------------------|
| <b>Chemicals, Peptides, Recombinant Proteins and Culture medium</b>  |                    |                   |
| Fixable Viability Dye eFluor 780                                     | eBioscience        | 65-0865-14        |
| PHA-L Solution (500*)                                                | eBioscience        | 00-4977-93        |
| 1M HEPES                                                             | Solarbio           | H1095             |
| PBS                                                                  | Hyclone            | SH3025601         |
| Streptavidin-APC                                                     | Biolegend          | 405207 / 100 µg   |
| GolgiStop                                                            | BD Biosciences     | 554724            |
| GolgiPlug                                                            | BD Biosciences     | 555029            |
| SARS-CoV-2(2019-nCoV) Spike S1-His Recombinant Protein, Biotinylated | SinoBiological     | 40591-V08H-B-20µg |
| DMSO                                                                 | Sigma              | D2650-5*10 ml     |
| SARS-CoV-2 Spike peptide library*                                    | GenScript          | RP30020           |
| SARS-CoV-2 Nucleocapsid peptide library*                             | GenScript          | RP30013           |
| SARS-CoV-2 Membrane peptide library*                                 | GenScript          | RP30022           |
| Sodium Pyruvate 100 mM Solution                                      | Gibco              | 11360070          |
| 2-Mercaptoethanol                                                    | Gibco              | 21985023          |
| BASIC RPMI 1640 Medium                                               | Gibco              | C11875500BT       |
| MEM NEAA, 100x*                                                      | Gibco              | 11140050          |
| Penicillin-Streptomycin, Liquid                                      | Gibco              | 15140122          |
| Ficoll-Hypaque gradient                                              | GE Healthcare Life | 17144003          |
| <b>Critical Commercial Assay Kits</b>                                |                    |                   |
| fixation/permeabilization solution kit                               | BD Biosciences     | 554714            |
| SARS-CoV-2(2019-nCoV) Spike S1 Antibody Titer Assay Kit              | SinoBiological     | KIT003            |
| IFN-γ Matched ELISA Antibody Pair Set, Human                         | SinoBiological     | SEKA11725-5Plates |
| ELISA Supplemental Solution Set                                      | SinoBiological     | SEKCR02-5Plates   |
| Human IFN-γ SARS-CoV-2 ELISpotPLUS kit (HRP), strips                 | Mabtech            | 3420-4HST-P1-1    |
| Human IgG SARS-CoV-2 RBD ELISpotPLUS(HRP)                            | Mabtech            | 3850-4HPW-R1-1    |
| <b>Antibody</b>                                                      |                    |                   |
| <b>Human</b>                                                         |                    |                   |
| Anti-CD28                                                            | eBioscience        | 16-0289-85-500ug  |
| PerCP/Cyanine5.5 anti-human                                          | Biolegend          | HIT3a             |

|                                                     |           |                   |
|-----------------------------------------------------|-----------|-------------------|
| CD3                                                 |           |                   |
| PE/Cyanine7 anti-human CD4                          | Biolegend | A161A1            |
| FITC anti-human CD8a                                | Biolegend | RPA-T8            |
| Pacific Blue™ anti-human CD45RA                     | Biolegend | HI100             |
| PE anti-human CD197 (CCR7)                          | Biolegend | G043H7            |
| Brilliant Violet 510™ anti-human HLA-DR             | Biolegend | L243              |
| PE anti-human CD38                                  | Biolegend | HB-7              |
| APC anti-human CD134 (OX40)                         | Biolegend | Ber-ACT35 (ACT35) |
| FITC anti-human CD154(CD40L)                        | Biolegend | 24-31             |
| Pacific Blue™ anti-human CD69                       | Biolegend | FN50              |
| PE/Cyanine7 anti-human CD137 (4-1BB)                | Biolegend | 4B4-1             |
| FITC anti-human CD185 (CXCR5)                       | Biolegend | J252D4            |
| Brilliant Violet 510™ anti-human CD183 (CXCR3)      | Biolegend | G025H7            |
| PE anti-human CD196 (CCR6)                          | Biolegend | G034E3            |
| Brilliant Violet 510™ anti-human IFN-γ              | Biolegend | B27               |
| PerCP anti-human CD19                               | Biolegend | 4G7               |
| FITC anti-human CD21                                | Biolegend | Bu32              |
| Pacific Blue™ anti-human CD27                       | Biolegend | M-T271            |
| Brilliant Violet 510™ anti-human CD138 (Syndecan-1) | Biolegend | MI15              |
| PE/Cyanine7 anti-human IgG Fc                       | Biolegend | HP6017            |

Peptide library preparation: Dissolve the lyophilized peptide pool by addition of 40 µl DMSO to the vial. Then add 85 µl PBS, mix and aliquote and store at -20°C or below. This stock solution will have a concentration of 200 µg/ml of each peptide.
